# Supplementary material for: Does chronic consumption of orange juice improve cardiovascular risk factors in overweight and obese adults? A systematic review and meta-analysis of randomized controlled trials
Source: Royal Society of Chemistry journal article supplement (doi:10.1039/d2fo02195a), 2022-01-01
Supplement: d2fo02195a1.pdf [file d2fo02195a1.pdf]

## Appendix A1

### 1. Low-density lipoprotein cholesterol

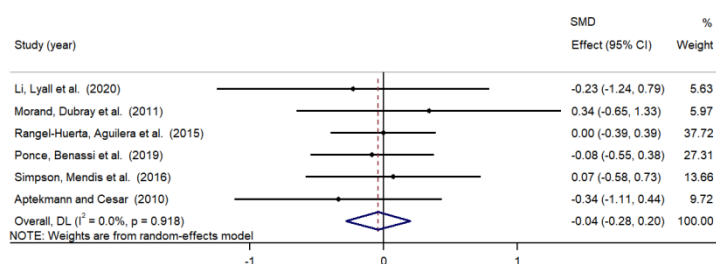

**Fig. A1.1.** Forest plot of low-density lipoprotein cholesterol without Ribeiro et al. study

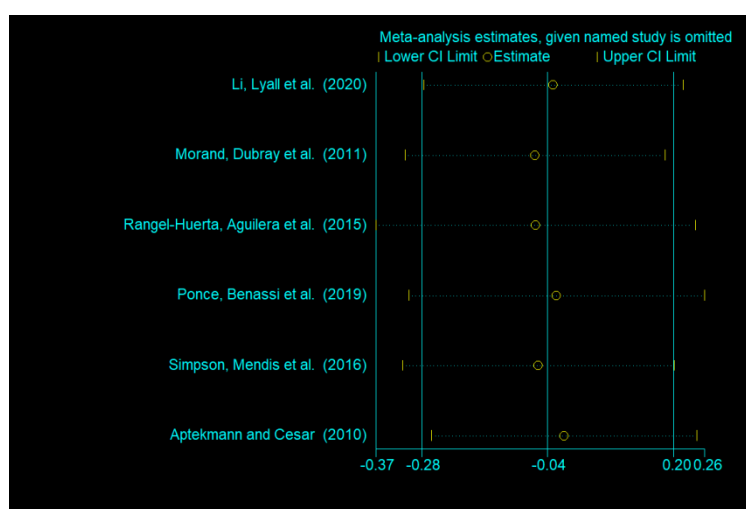

**Fig. A1.2.** Sensitivity analysis of low-density lipoprotein cholesterol without Ribeiro et al. study

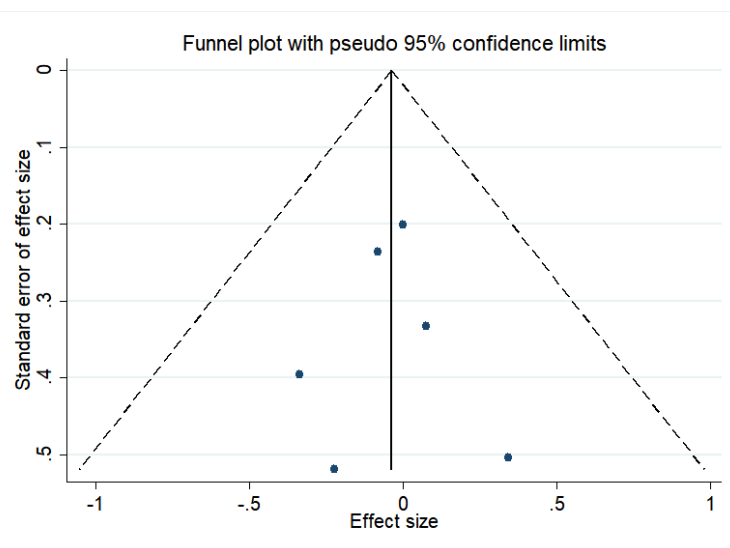

**Fig. A1.3.** Funnel plot of low-density lipoprotein cholesterol without Ribeiro et al. study

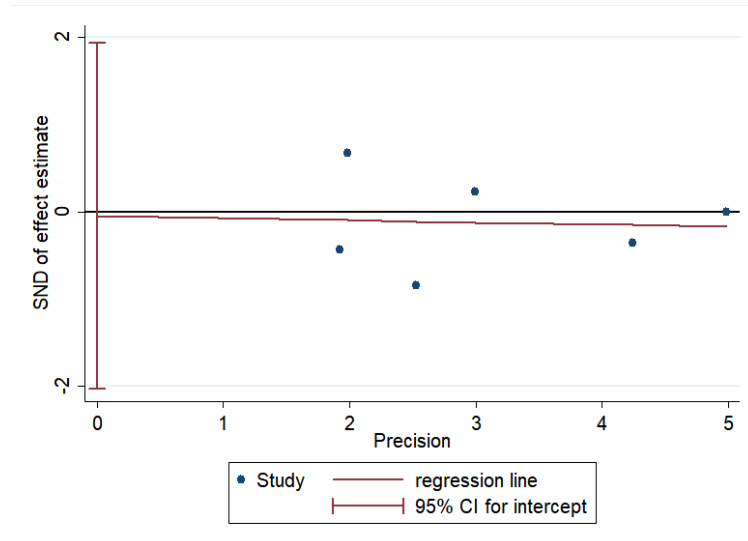

**Fig. A1.4.** Egger's regression plot of low-density lipoprotein cholesterol without Ribeiro et al. study

```
. metabias _ES _seES,egger graph
```

Note: data input format *theta se\_theta* assumed

Egger's test for small-study effects:  
Regress standard normal deviate of intervention  
effect estimate against its standard error

```
.
Number of studies = 6                                Root MSE = .6023
```

| Std_Eff | Coef.     | Std. Err. | t     | P> t  | [95% Conf. Interval] |          |
|---------|-----------|-----------|-------|-------|----------------------|----------|
| slope   | -.0231633 | .2155116  | -0.11 | 0.920 | -.6215195            | .575193  |
| bias    | -.0509661 | .7140129  | -0.07 | 0.947 | -2.033384            | 1.931452 |

Test of H0: no small-study effects                      P = 0.947

**Fig. A1.5.** Egger's test of low-density lipoprotein cholesterol without Ribeiro et al. study

## Appendix A2

### 2. Glucose

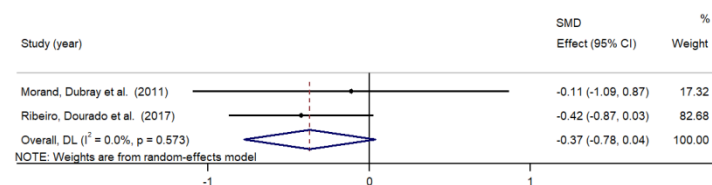

**Fig. A2.1.** Forest plot of glucose without Rangel-Huerta et al. study

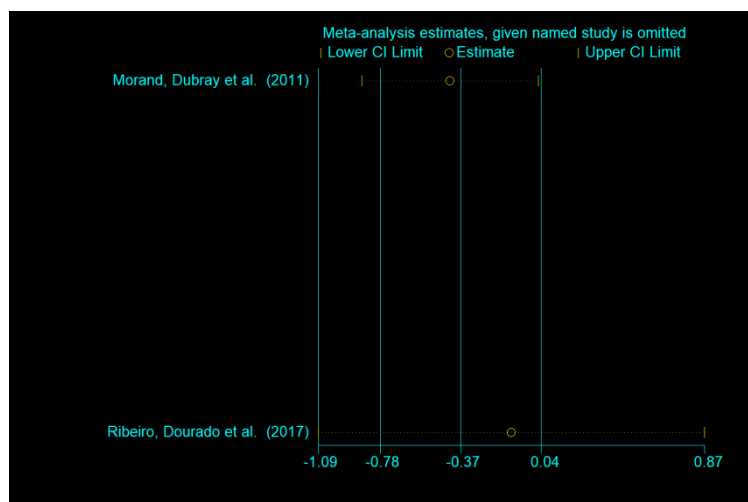

**Fig. A2.2.** Sensitivity analysis of glucose without Rangel-Huerta et al. study

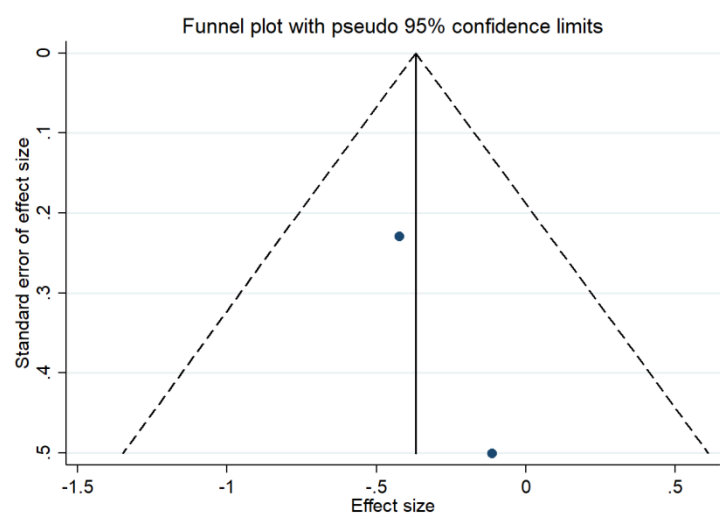

**Fig. A2.3.** Funnel plot of glucose without Rangel-Huerta et al. study

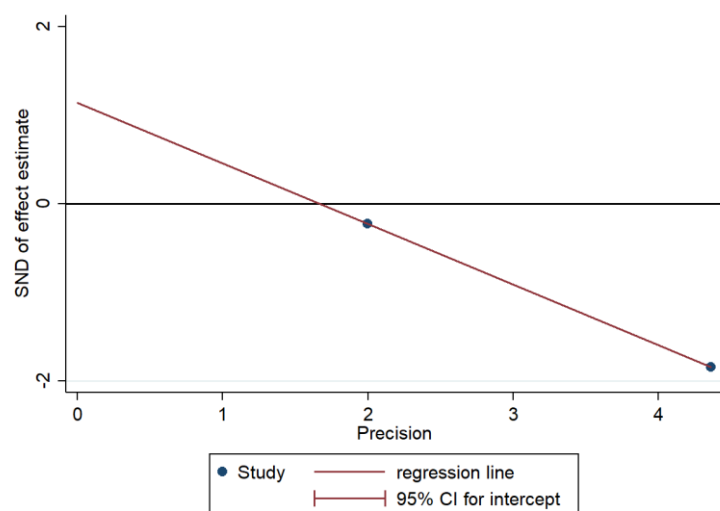

**Fig. A2.4.** Egger's regression plot of glucose without Rangel-Huerta et al. study

Appendix A3

3. Homeostatic model assessment of insulin resistance

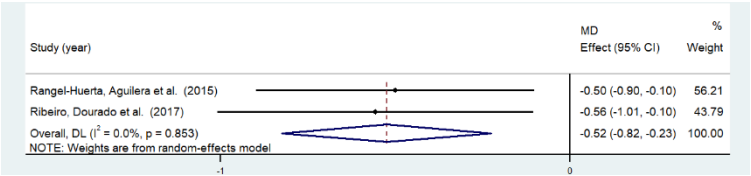

Fig. A3.1. Forest plot of homeostatic model assessment of insulin resistance without Ponce, Benassi et al. study

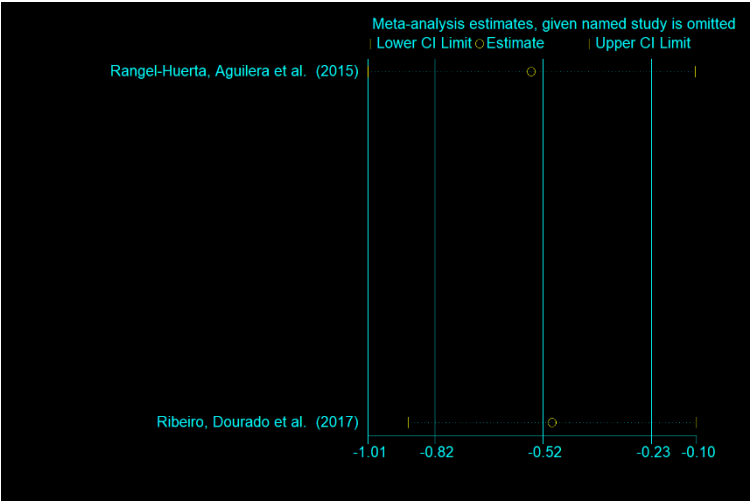

Fig. A3.2. Sensitivity analysis of homeostatic model assessment of insulin resistance without Ponce, Benassi et al. study

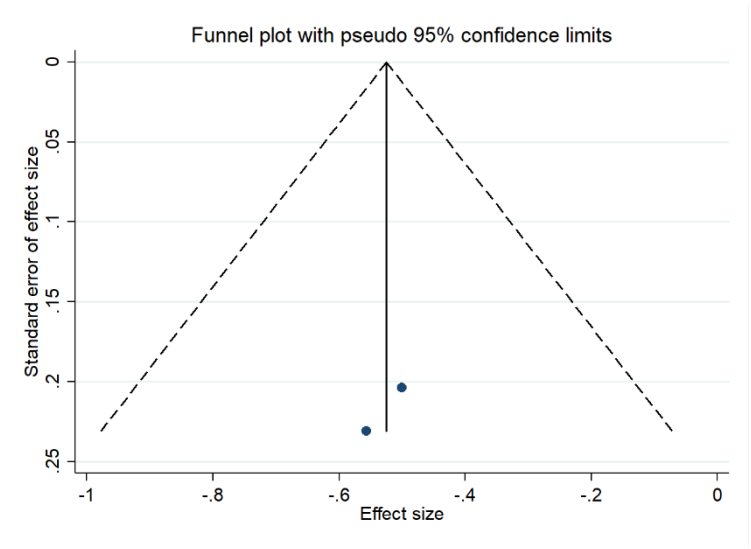

Fig. A3.3. Funnel plot of homeostatic model assessment of insulin resistance without Ponce, Benassi et al. study

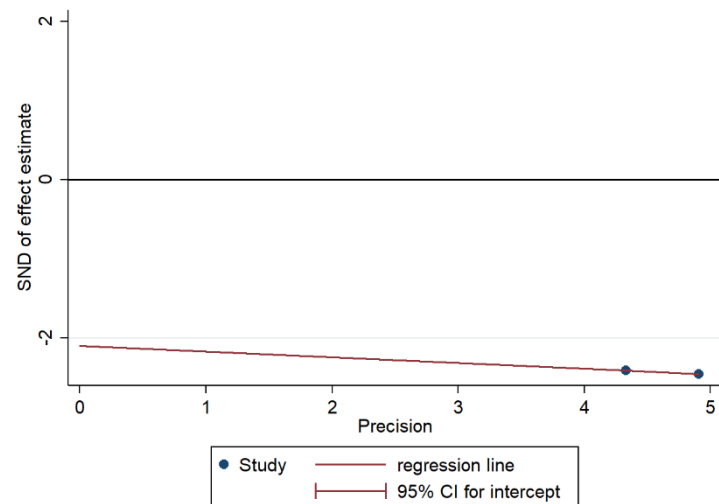

**Fig. A3.4.** Egger's regression plot of homeostatic model assessment of insulin resistance without Ponce, Benassi et al. study

## Appendix A4

### 4. C-reactive protein

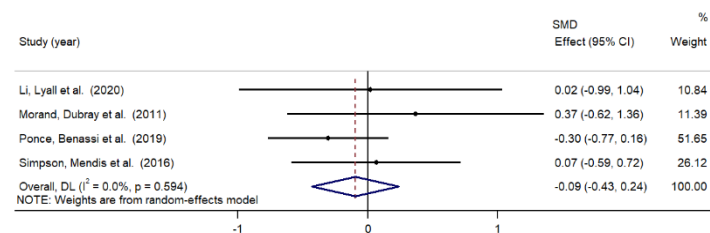

**Fig. A4.1.** Forest plot of C-reactive protein without Ribeiro et al. study

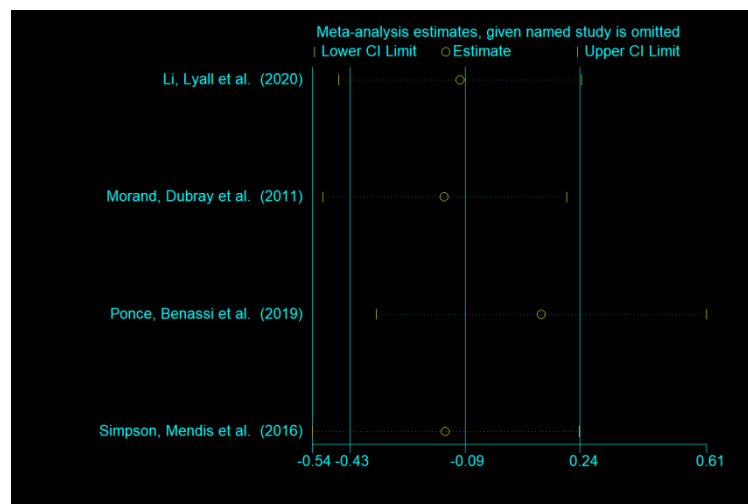

**Fig. A4.2.** Sensitivity analysis of C-reactive protein without Ribeiro et al. study

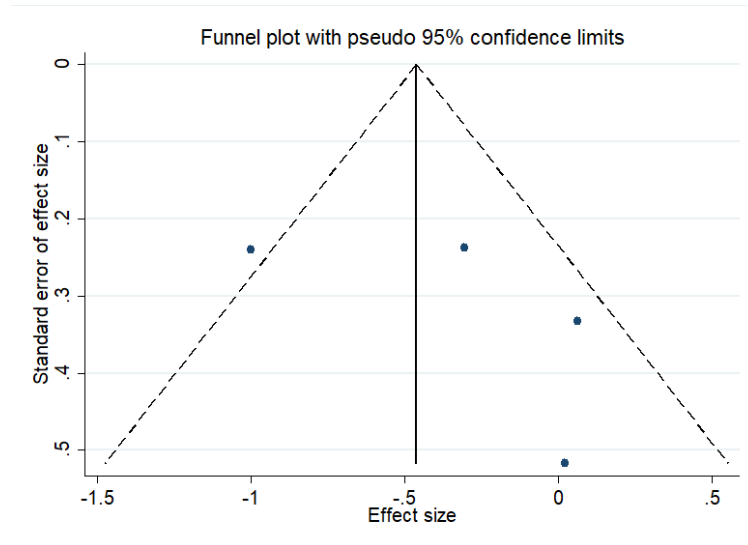

**Fig. A4.3.** Funnel plot of C-reactive protein without Ribeiro et al. study

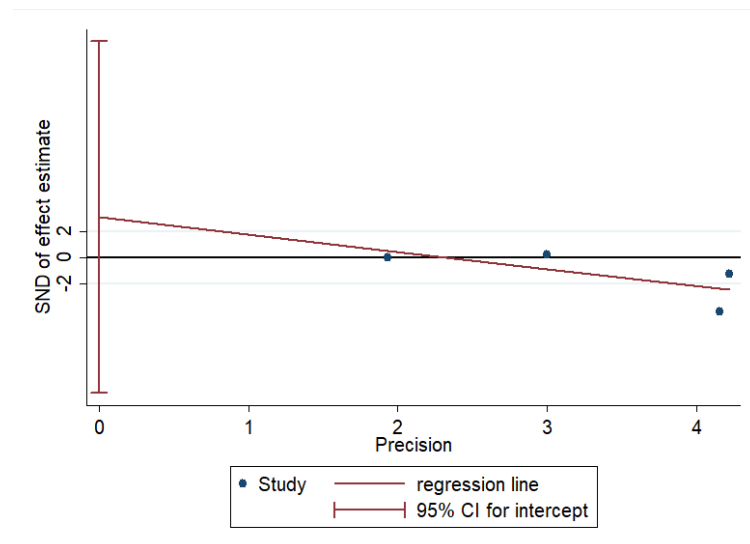

**Fig. A4.4.** Egger's regression plot of C-reactive protein without Ribeiro et al. study

```
. metabias _ES _seES,egger graph
Note: data input format theta se_theta assumed
Egger's test for small-study effects:
Regress standard normal deviate of intervention
effect estimate against its standard error
.
Number of studies = 4                                Root MSE = 1.72
```

| Std_Eff | Coef.    | Std. Err. | t     | P> t  | [95% Conf. Interval] |          |
|---------|----------|-----------|-------|-------|----------------------|----------|
| slope   | -1.33357 | .9148564  | -1.46 | 0.282 | -5.269879            | 2.602739 |
| bias    | 3.137604 | 3.162583  | 0.99  | 0.426 | -10.46989            | 16.7451  |

```
Test of H0: no small-study effects                P = 0.426
```

**Fig. A4.5.** Egger's test of C-reactive protein without Ribeiro et al. study

## Appendix A5

### 5. Total cholesterol

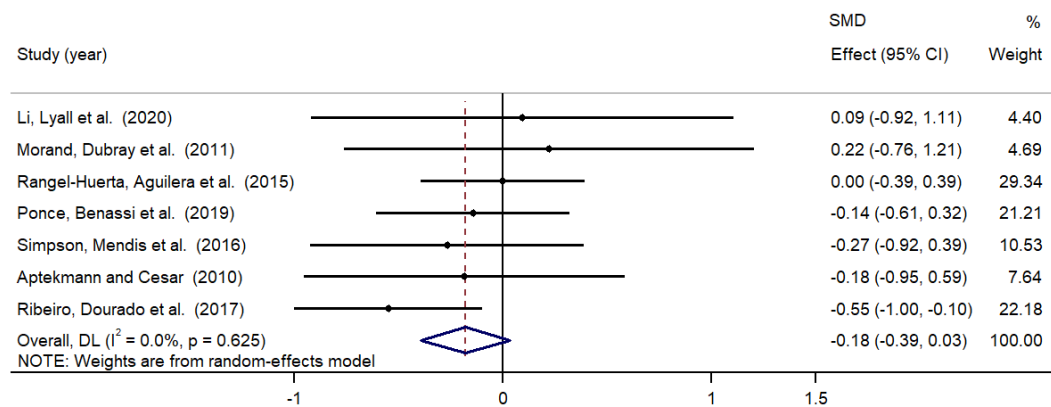

**Fig. A5.1.** Forest plot of total cholesterol

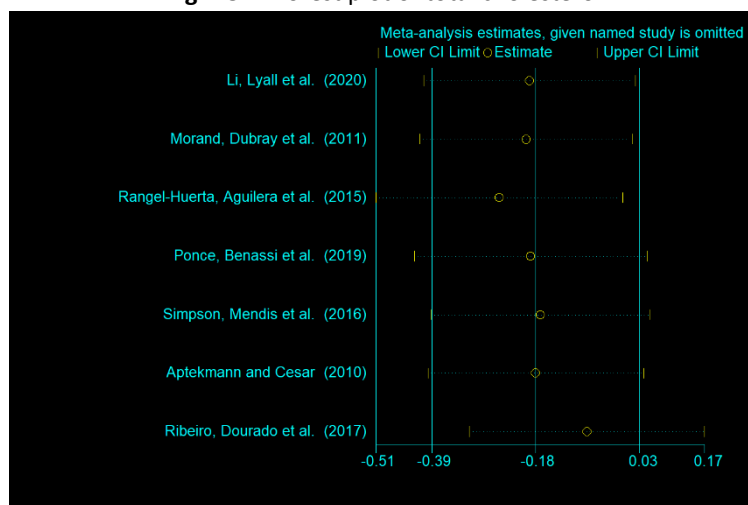

**Fig. A5.2.** Sensitivity analysis of total cholesterol

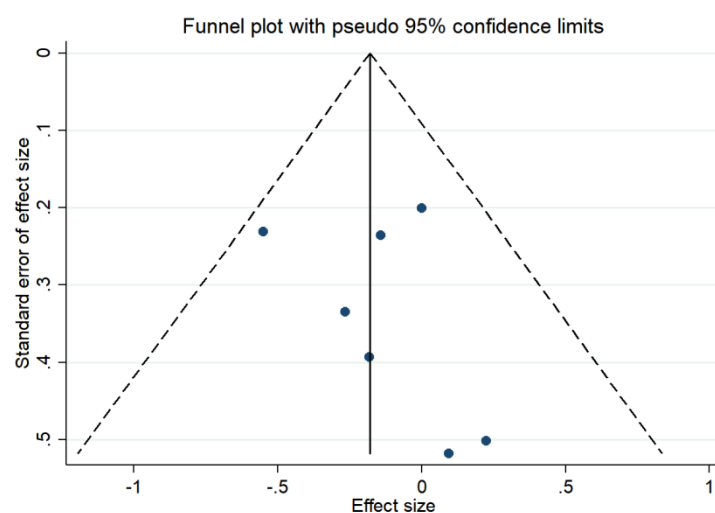

**Fig. A5.3.** Funnel plot of total cholesterol

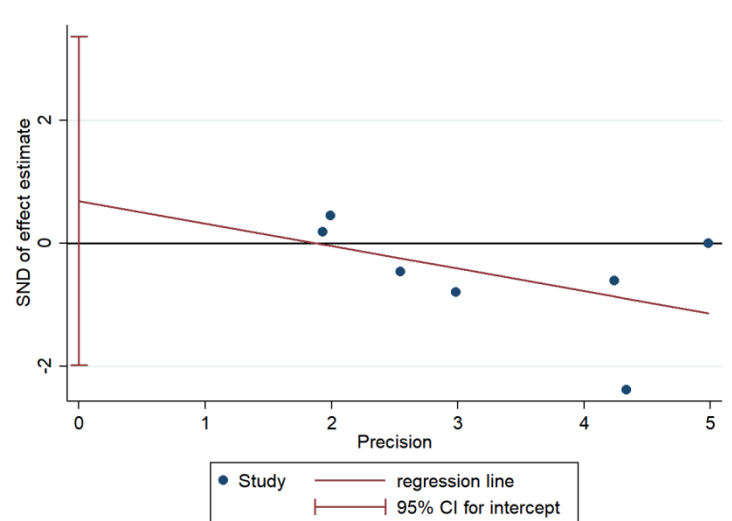

**Fig. A5.4.** Egger's regression plot of total cholesterol

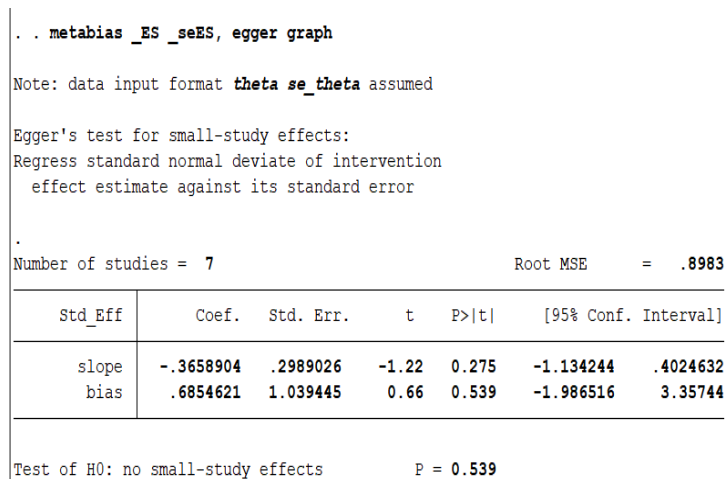

**Fig. A5.5.** Egger's test of total cholesterol

## 6. Triglycerides

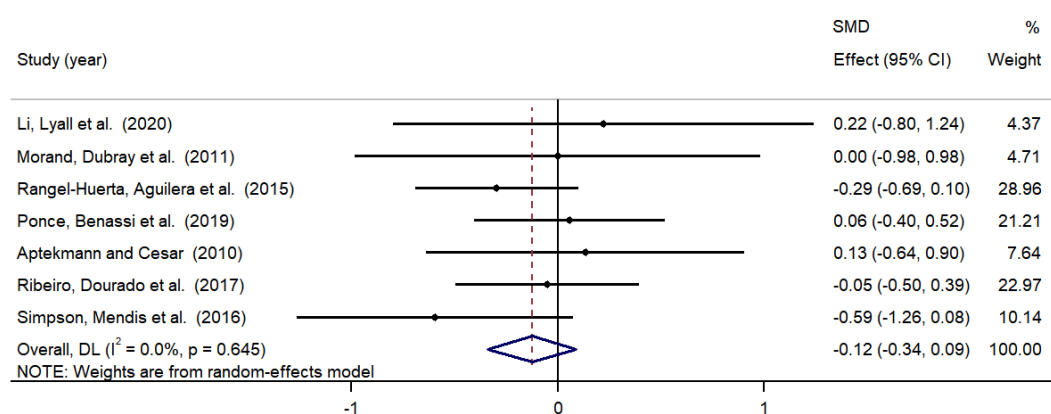

**Fig. A6.1.** Forest plot of triglycerides



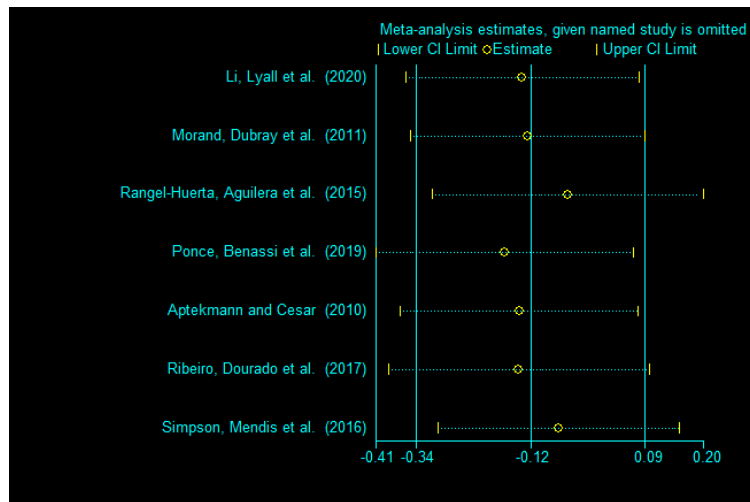

**Fig. A6.2.** Sensitivity analysis of triglycerides

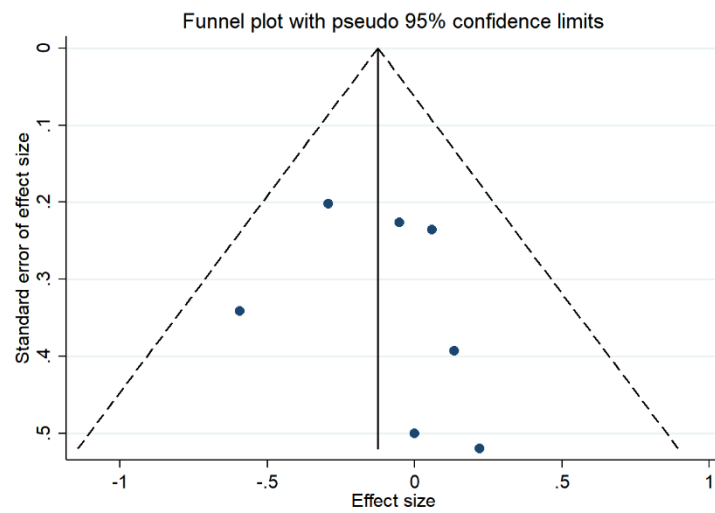

**Fig. A6.3.** Funnel plot of triglycerides

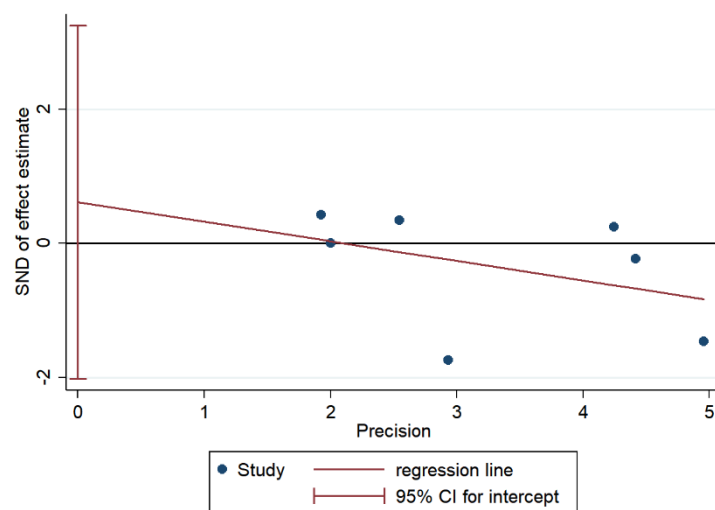

**Fig. A6.4.** Egger's regression plot of triglycerides



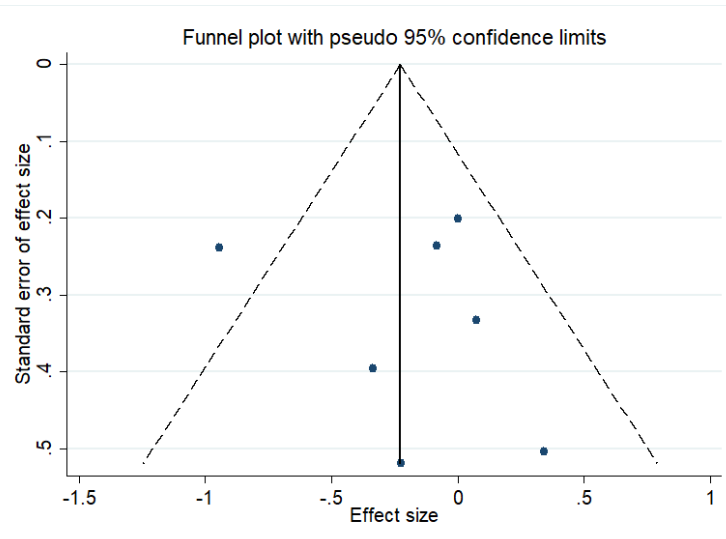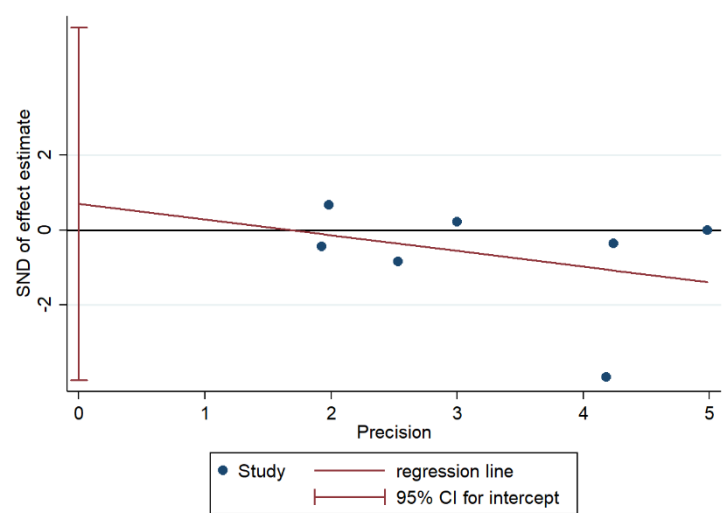

**Fig. A7.4.** Egger's regression plot of low-density lipoprotein cholesterol

```
. metabias _ES _seES, egger graph
```

Note: data input format **theta se\_theta** assumed

Egger's test for small-study effects:  
Regress standard normal deviate of intervention  
effect estimate against its standard error

```
.
Number of studies = 7                                Root MSE      = 1.576
```

| Std_Eff | Coef.     | Std. Err. | t     | P> t  | [95% Conf. Interval] |          |
|---------|-----------|-----------|-------|-------|----------------------|----------|
| slope   | -.4201332 | .53132    | -0.79 | 0.465 | -1.785935            | .9456683 |
| bias    | .7022749  | 1.833565  | 0.38  | 0.717 | -4.011054            | 5.415604 |

Test of H0: no small-study effects                      P = 0.717

## 8. High-density lipoprotein cholesterol

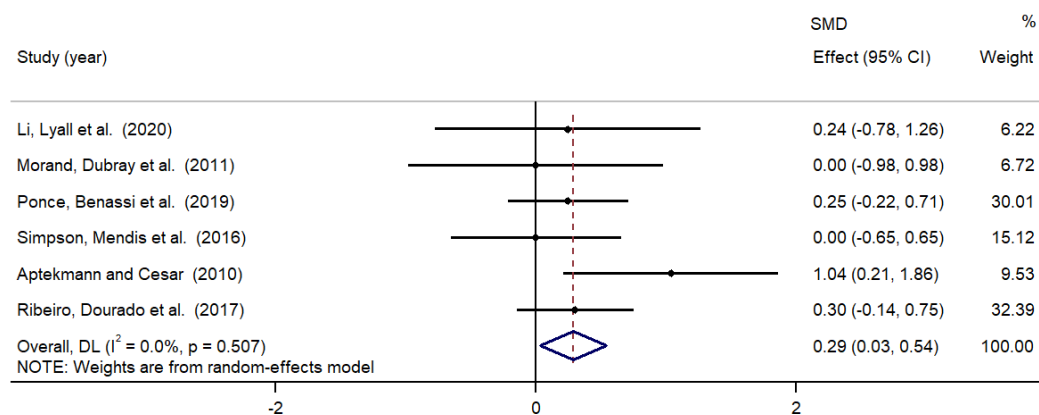

**Fig. A8.1.** Forest plot of high-density lipoprotein cholesterol

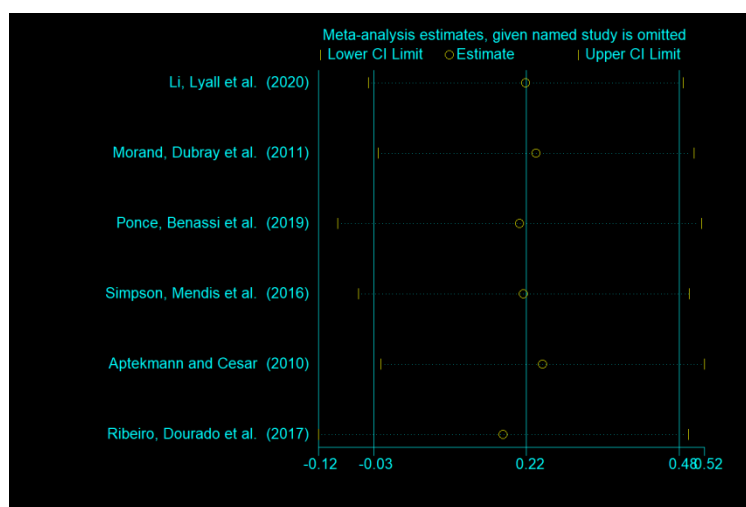

**Fig. A8.2.** Sensitivity analysis of high-density lipoprotein cholesterol

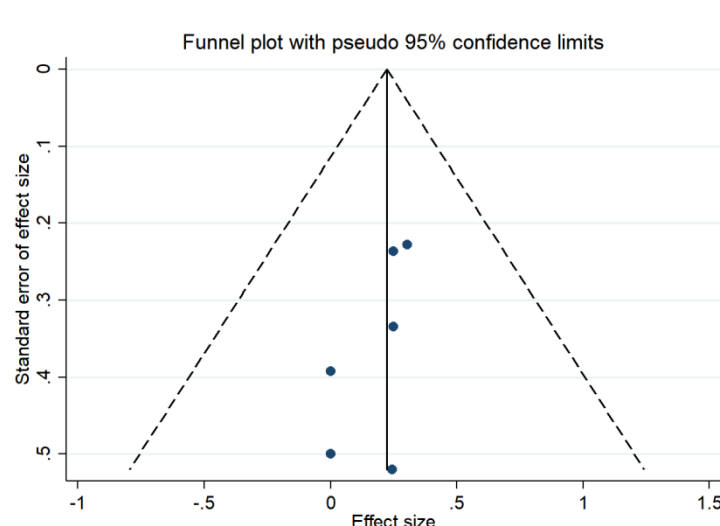

**Fig. A8.3.** Funnel plot of high-density lipoprotein cholesterol

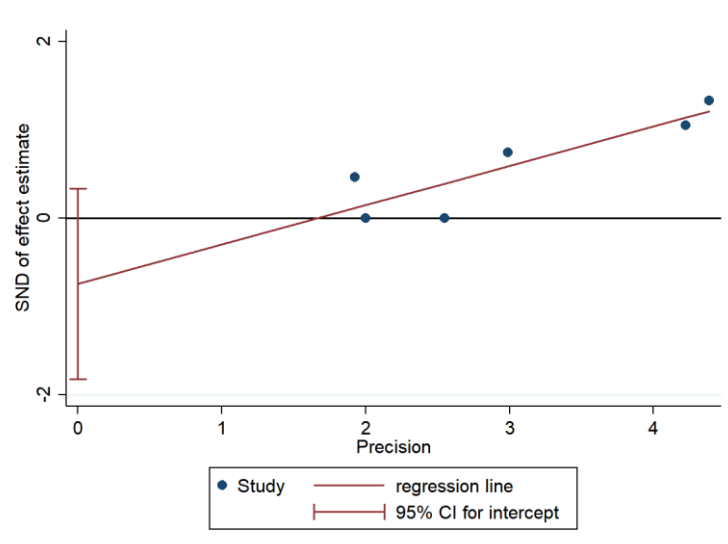

**Fig. A8.4.** Egger's regression plot of high-density lipoprotein cholesterol

```
. metabias _ES _seES, egger graphc
```

Note: data input format **theta se\_theta** assumed

Egger's test for small-study effects:  
Regress standard normal deviate of intervention  
effect estimate against its standard error

```
.
Number of studies = 6                                Root MSE = 1.031
```

| Std_Eff | Coef.    | Std. Err. | t    | P> t  | [95% Conf. Interval] |
|---------|----------|-----------|------|-------|----------------------|
| slope   | .1977551 | .4217592  | 0.47 | 0.664 | -.973236 1.368746    |
| bias    | .2965928 | 1.328206  | 0.22 | 0.834 | -3.391098 3.984284   |

```
Test of H0: no small-study effects                    P = 0.834
```

**Fig. A8.5.** Egger's test of high-density lipoprotein cholesterol

### 9. Systolic blood pressure

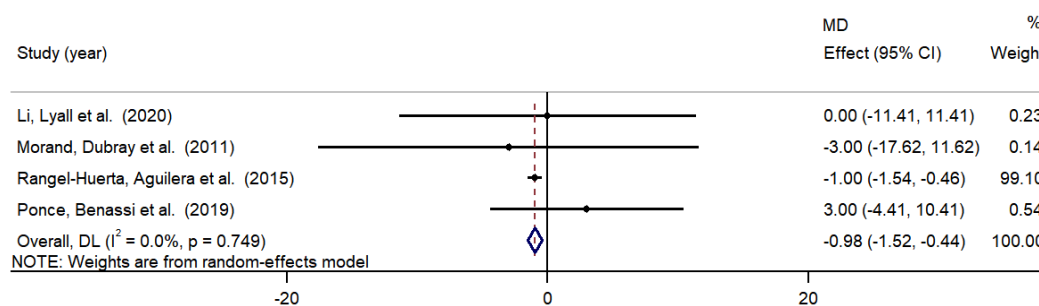

**Fig. A9.1.** Forest plot of systolic blood pressure

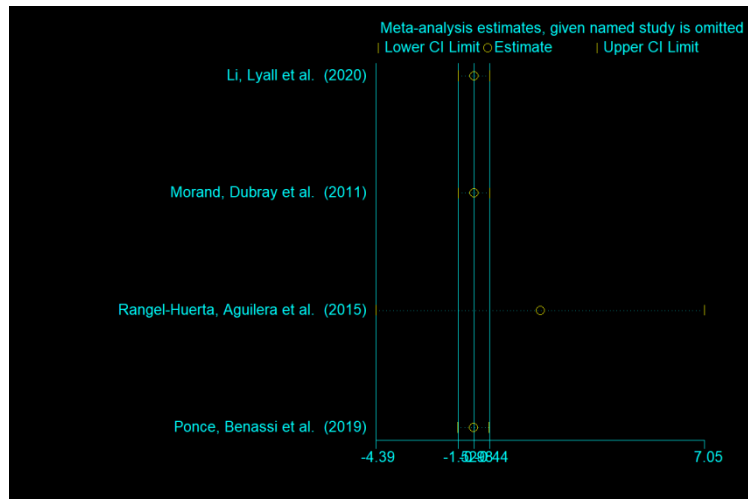

**Fig. A9.2.** Sensitivity analysis of systolic blood pressure

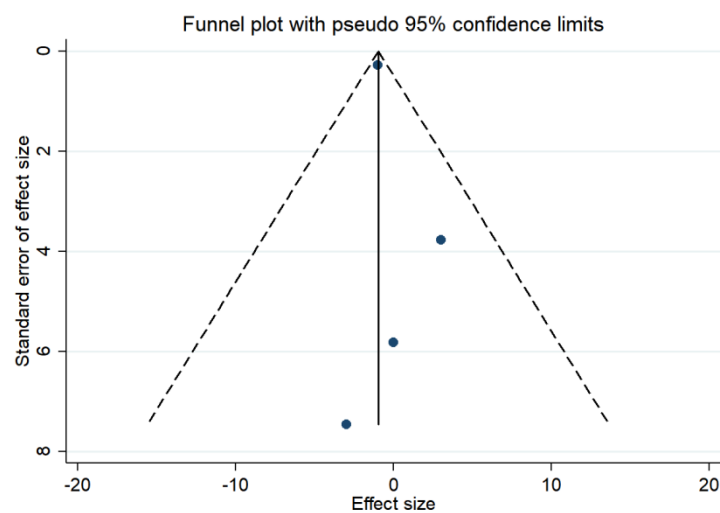

**Fig. A9.3.** Funnel plot of systolic blood pressure

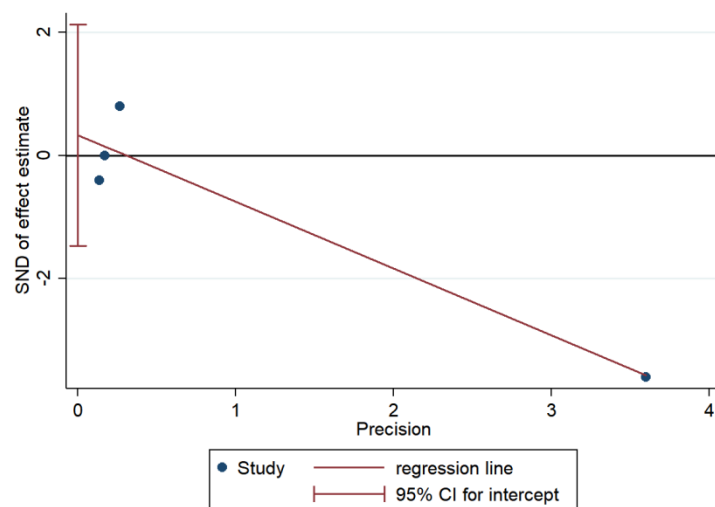

**Fig. A9.4.** Egger's regression plot of systolic blood pressure

```

.. metabias _ES _seES, egger graph
Note: data input format theta se_theta assumed

Egger's test for small-study effects:
Regress standard normal deviate of intervention
effect estimate against its standard error

.
Number of studies = 4                                Root MSE = .6818

```

| Std_Eff | Coef.     | Std. Err. | t     | P> t  | [95% Conf. Interval] |
|---------|-----------|-----------|-------|-------|----------------------|
| slope   | -1.083633 | .2309647  | -4.69 | 0.043 | -2.077394 - .0898724 |
| bias    | .3276749  | .4172575  | 0.79  | 0.515 | -1.467639 2.122989   |

```

Test of H0: no small-study effects                    P = 0.515

```

**Fig. A9.5.** Egger's test of systolic blood pressure

## 10. Diastolic blood pressure

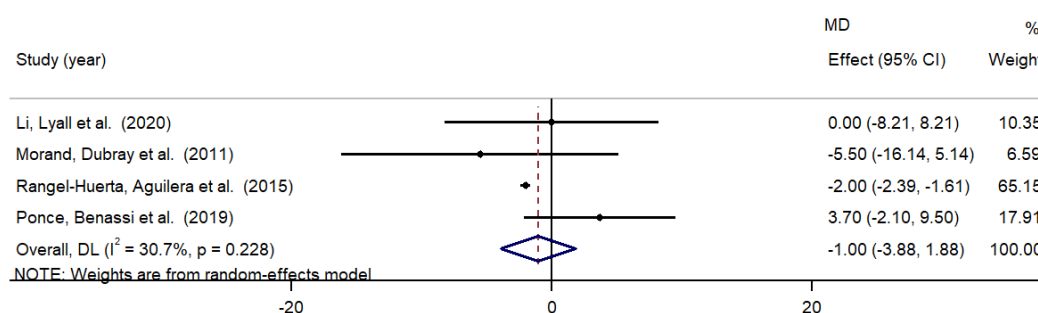

**Fig. A10.1.** Forest plot of diastolic blood pressure

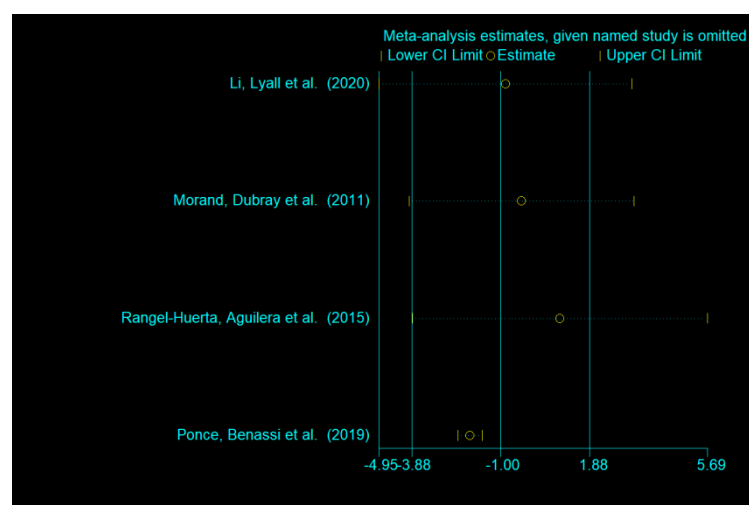

**Fig. A10.2.** Sensitivity analysis of diastolic blood pressure

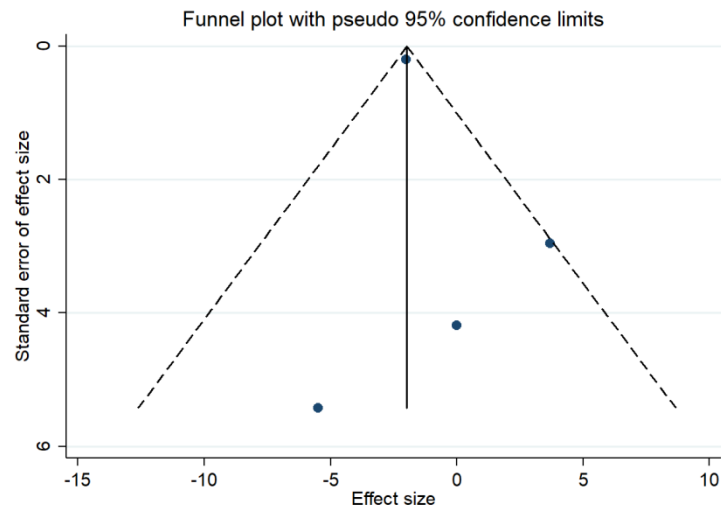

**Fig. A10.3.** Funnel plot of diastolic blood pressure

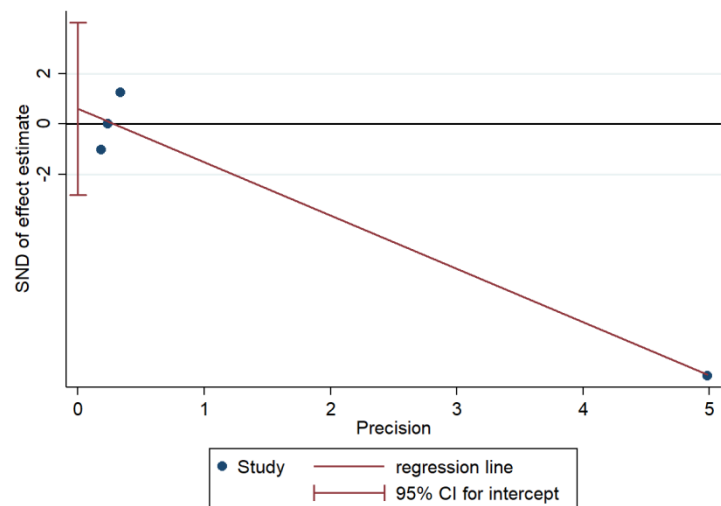

**Fig. A10.4.** Egger's regression plot of diastolic blood pressure

```
. metabias _ES_seES,egger graph
```

Note: data input format *theta se\_theta* assumed

Egger's test for small-study effects:  
Regress standard normal deviate of intervention  
effect estimate against its standard error

```
.
Number of studies = 4                                Root MSE      = 1.297
```

| Std_Eff | Coef.     | Std. Err. | t     | P> t  | [95% Conf. Interval] |           |
|---------|-----------|-----------|-------|-------|----------------------|-----------|
| slope   | -2.111866 | .3165695  | -6.67 | 0.022 | -3.473955            | -.7497778 |
| bias    | .6000213  | .7921347  | 0.76  | 0.528 | -2.808259            | 4.008302  |

Test of H0: no small-study effects                      P = 0.528

**Fig. A10.5.** Egger's test of diastolic blood pressure



11. Glucose

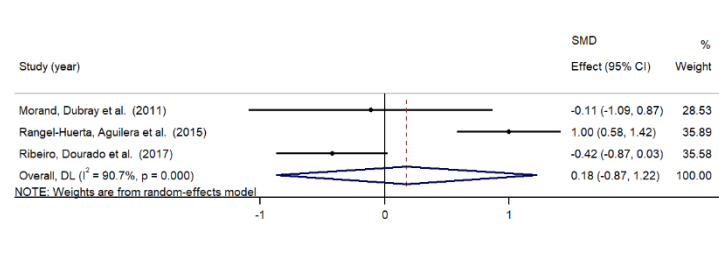

Fig. A11.1. Forest plot of glucose

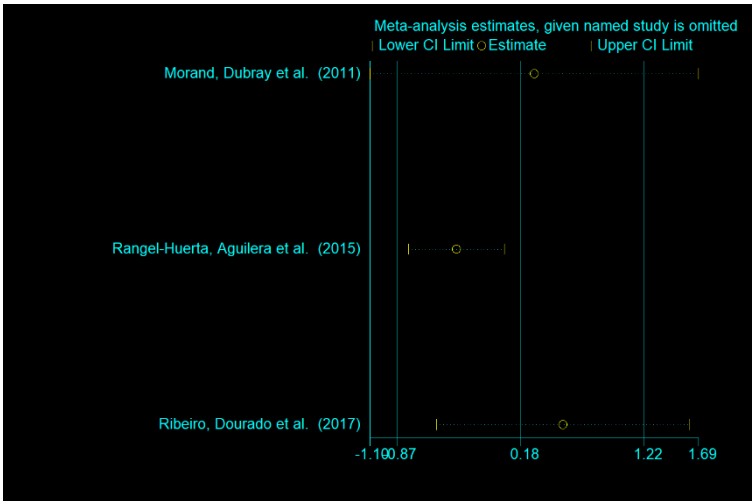

Fig. A11.2. Sensitivity analysis of glucose

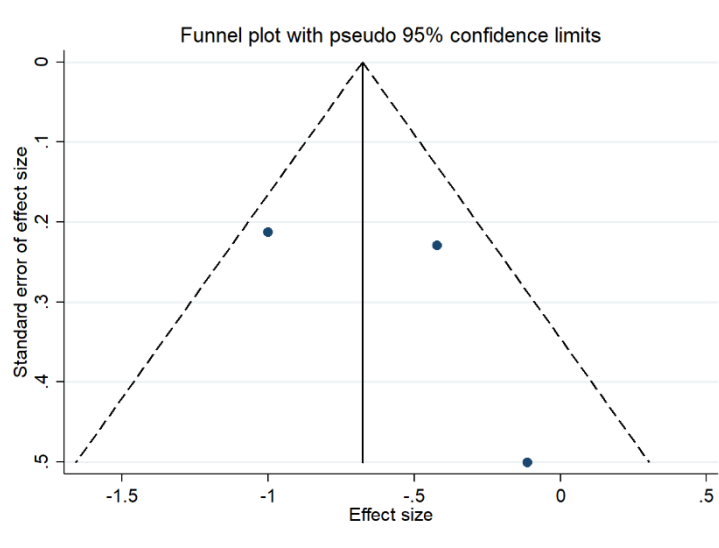

Fig. A11.3. Funnel plot of glucose

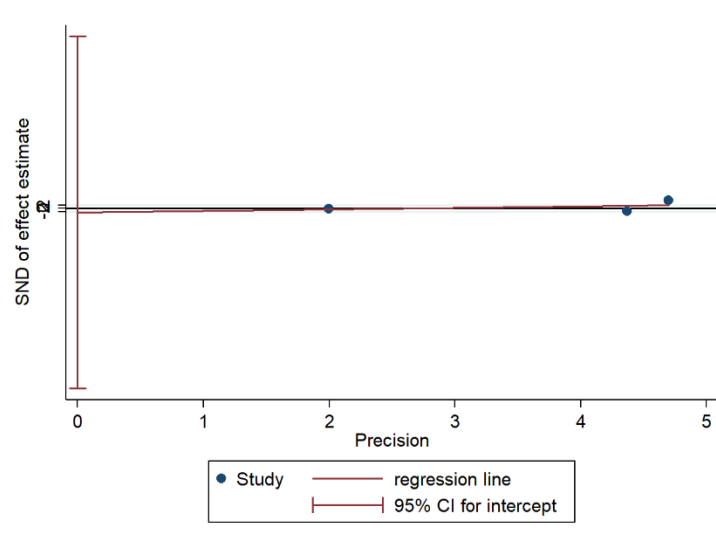

**Fig. A11.4.** Egger's regression plot of glucose

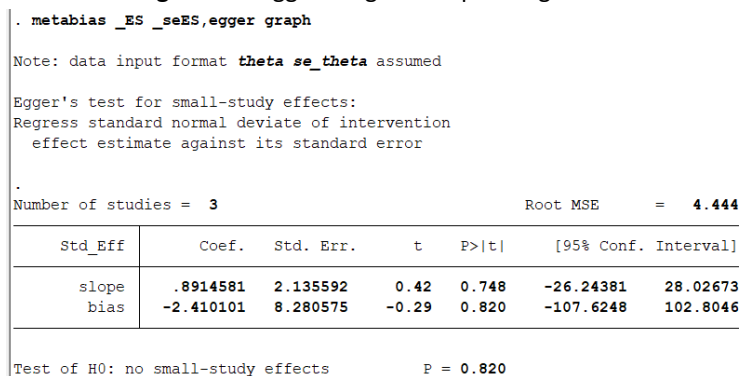

**Fig. A11.5.** Egger's test of glucose

## 12. Insulin

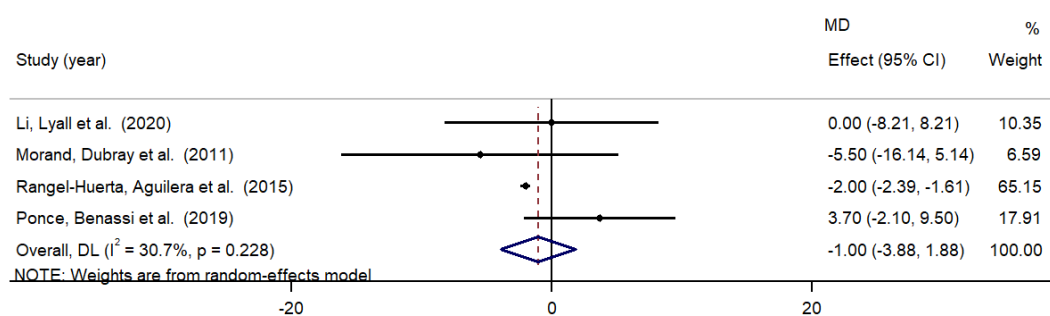

**Fig. A12.1.** Forest plot of insulin

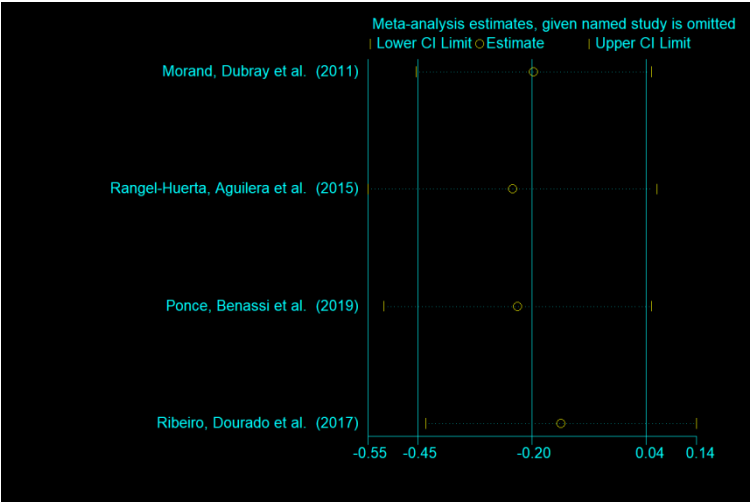

Fig. A12.2. Sensitivity analysis of insulin

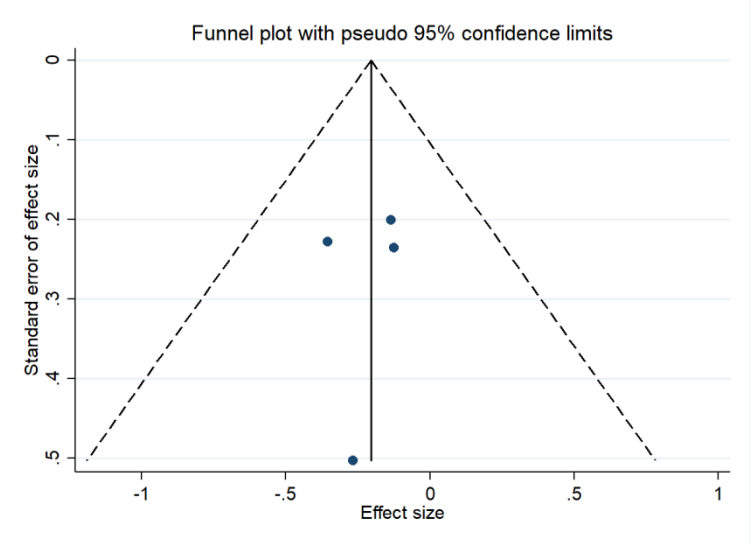

Fig. A12.3. Funnel plot of insulin

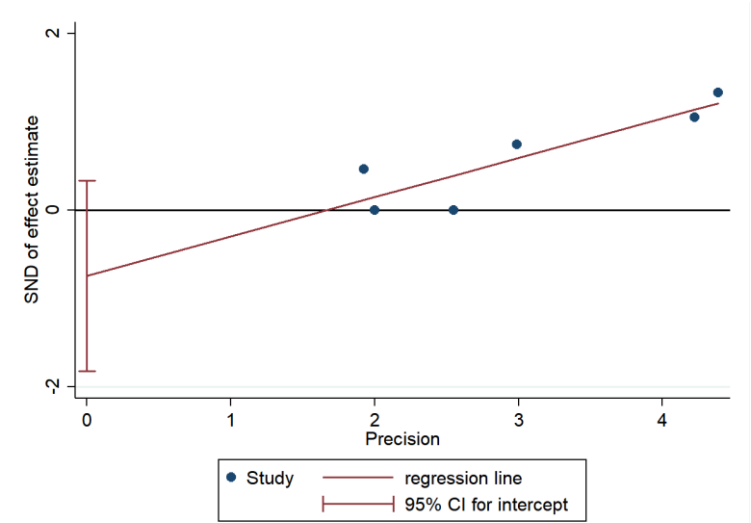

Fig. A12.4. Egger's regression plot of insulin

```

. metabias _ES_seES,egger graph
Note: data input format theta se_theta assumed

Egger's test for small-study effects:
Regress standard normal deviate of intervention
effect estimate against its standard error

.
Number of studies = 4                                Root MSE      = .5641

```

| Std_Eff | Coef.     | Std. Err. | t     | P> t  | [95% Conf. Interval] |
|---------|-----------|-----------|-------|-------|----------------------|
| slope   | -.1268301 | .2484415  | -0.51 | 0.660 | -1.195788 .9421275   |
| bias    | -.3274585 | 1.008392  | -0.32 | 0.776 | -4.666221 4.011304   |

```

Test of H0: no small-study effects                    P = 0.776

```

Fig. A12.5. Egger's test of insulin

### 13. Homeostatic model assessment of insulin resistance

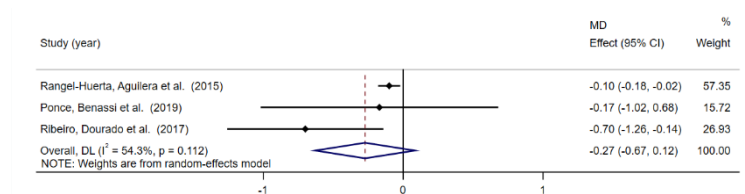

Fig. A13.1. Forest plot of homeostatic model assessment of insulin resistance

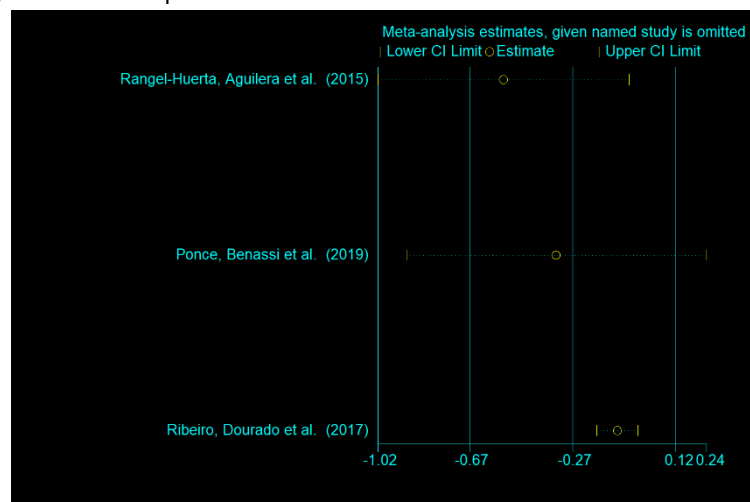

Fig. A13.2. Sensitivity analysis of homeostatic model assessment of insulin resistance

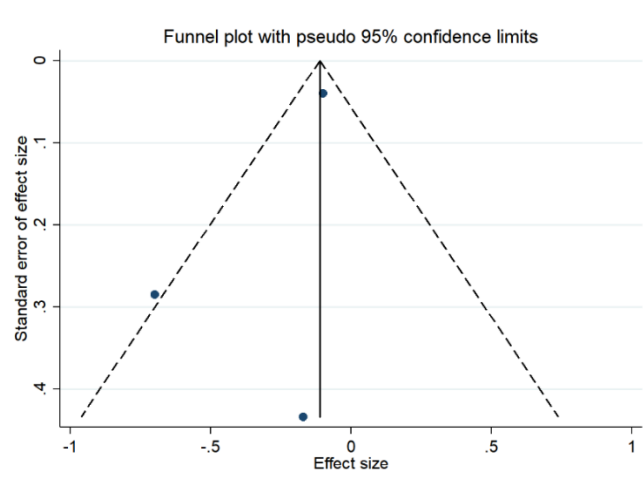

Fig. A13.3. Funnel plot of homeostatic model assessment of insulin resistance

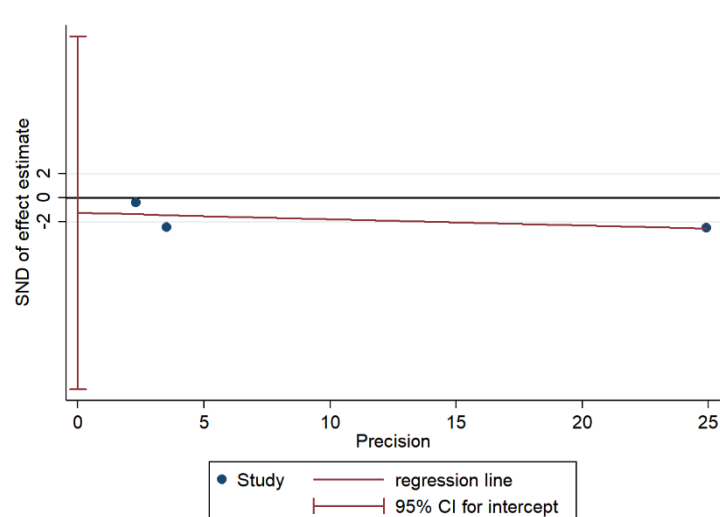

**Fig. A13.4.** Egger's regression plot of homeostatic model assessment of insulin resistance

Egger's test for small-study effects:  
Regress standard normal deviate of intervention  
effect estimate against its standard error

```

Number of studies = 3                                Root MSE      = 1.419

```

| Std_Eff | Coef.             | Std. Err.       | t            | P> t         | [95% Conf. Interval] |                 |
|---------|-------------------|-----------------|--------------|--------------|----------------------|-----------------|
| slope   | <b>-0.0521869</b> | <b>.0788518</b> | <b>-0.66</b> | <b>0.628</b> | <b>-1.054094</b>     | <b>.9497207</b> |
| bias    | <b>-1.246387</b>  | <b>1.150504</b> | <b>-1.08</b> | <b>0.475</b> | <b>-15.86492</b>     | <b>13.37215</b> |

Test of H0: no small-study effects P = 0.475

**Fig. A13.5.** Egger's test of homeostatic model assessment of insulin resistance

#### 14. C-reactive protein

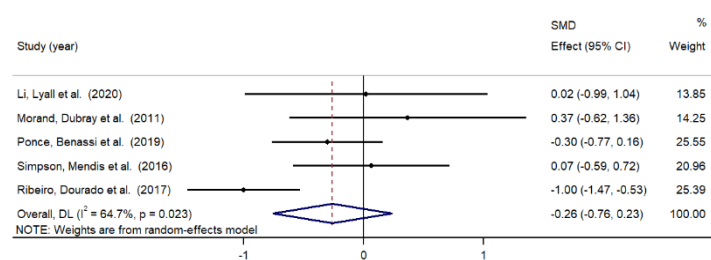

**Fig. A14.1.** Forest plot of C-reactive protein

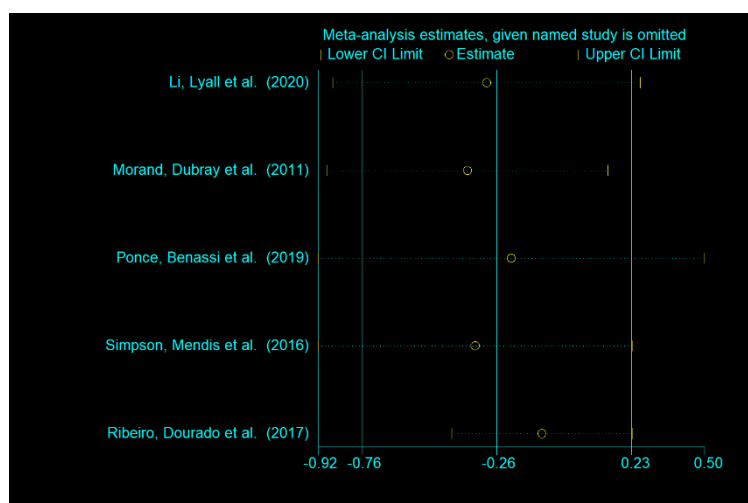

**Fig. A14.2.** Sensitivity analysis of C-reactive protein

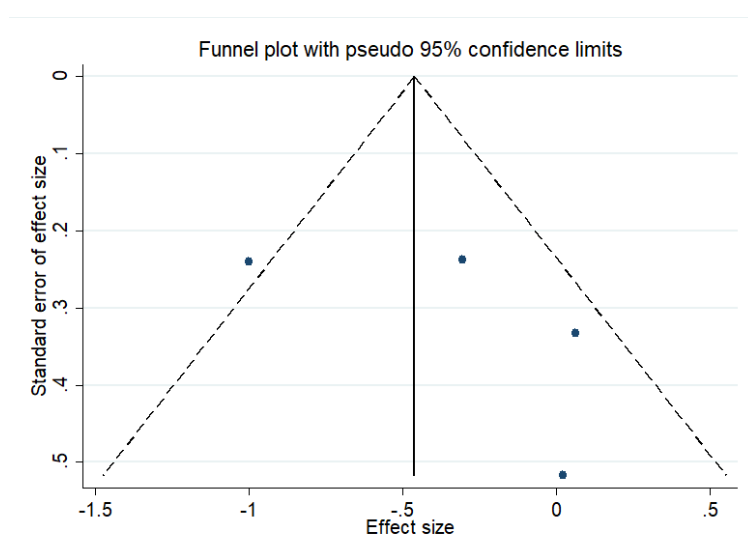

**Fig. A14.3.** Funnel plot of C-reactive protein

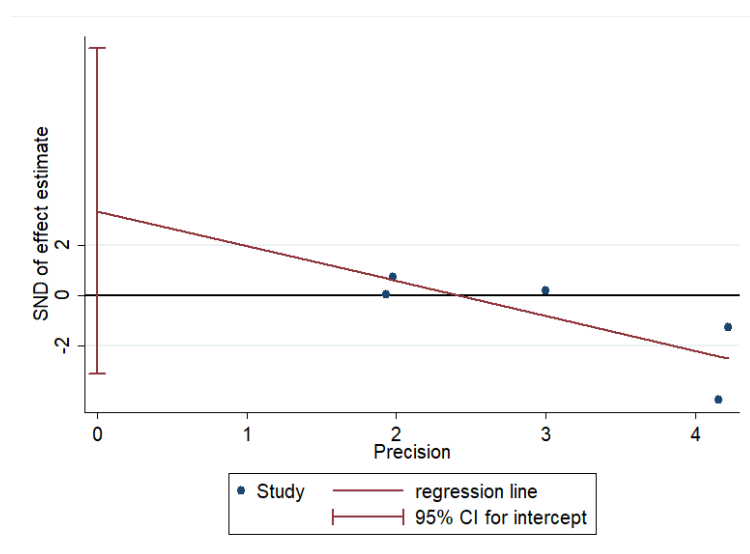

**Fig. A14.4.** Egger's regression plot of C-reactive protein

| Number of studies = 5 |           |           |       |       | Root MSE             | =        | 1.408 |
|-----------------------|-----------|-----------|-------|-------|----------------------|----------|-------|
| Std_Eff               | Coef.     | Std. Err. | t     | P> t  | [95% Conf. Interval] |          |       |
| slope                 | -1.384521 | .6307965  | -2.19 | 0.116 | -3.391997            | .6229548 |       |
| bias                  | 3.340567  | 2.028863  | 1.65  | 0.198 | -3.116179            | 9.797313 |       |

Test of H0: no small-study effects      P = 0.198

**Fig. A14.5.** Egger's test of C-reactive protein
